# Supplementary material for: Magnetique: an interactive web application to explore transcriptome signatures of heart failure
Source: Springer Nature journal article supplement (doi:10.1186/s12967-022-03694-z), 2022-11-07
Supplement: MOESM1 [file 23685376]

# Magnetique: A web application for interactive Transcriptome Exploration in Heart Failure

Thiago Britto-Borges, Annekathrin Ludt, Etienne Boileau, Enio Gjerga, Federico Marini, Christoph Dieterich

|             | Overall,<br>N = 354 <sup>1</sup> | DCM, N<br>= 165 <sup>1</sup> | HCM, N<br>= 27 <sup>1</sup> | NFD, N<br>= 162 <sup>1</sup> | p-value <sup>2</sup> |
|-------------|----------------------------------|------------------------------|-----------------------------|------------------------------|----------------------|
| <b>Race</b> |                                  |                              |                             |                              | <0.001               |
| AA          | 121 (34%)                        | 76 (46%)                     | 1 (3.7%)                    | 44 (27%)                     |                      |
| C           | 233 (66%)                        | 89 (54%)                     | 26 (96%)                    | 118 (73%)                    |                      |
| <b>Age</b>  | 56 (48, 62)                      | 54 (47, 59)                  | 51 (43, 57)                 | 57 (51, 65)                  | <0.001               |
| <b>Sex</b>  |                                  |                              |                             |                              | 0.021                |
| F           | 164 (46%)                        | 65 (39%)                     | 11 (41%)                    | 88 (54%)                     |                      |
| M           | 190 (54%)                        | 100 (61%)                    | 16 (59%)                    | 74 (46%)                     |                      |

|          |                |                |                |                |        |
|----------|----------------|----------------|----------------|----------------|--------|
| Weight   | 79 (66, 91)    | 76 (67, 90)    | 72 (60, 83)    | 82 (68, 99)    | 0.004  |
| Height   | 170 (163, 178) | 170 (163, 180) | 170 (160, 180) | 168 (163, 175) | 0.046  |
| Unknown  | 1              | 0              | 0              | 1              |        |
| HW       | 448 (372, 558) | 499 (419, 603) | 448 (366, 559) | 414 (345, 495) | <0.001 |
| Unknown  | 7              | 0              | 0              | 7              |        |
| LVMass   | 247 (199, 322) | 320 (262, 401) | 318 (276, 340) | 214 (179, 278) | <0.001 |
| Unknown  | 202            | 119            | 15             | 68             |        |
| AFib     | 104 (30%)      | 67 (41%)       | 20 (74%)       | 17 (11%)       | <0.001 |
| Unknown  | 4              | 3              | 0              | 1              |        |
| VTVF     | 85 (24%)       | 70 (43%)       | 14 (52%)       | 1 (0.6%)       | <0.001 |
| Unknown  | 2              | 1              | 0              | 1              |        |
| Diabetes | 76 (22%)       | 39 (24%)       | 0 (0%)         | 37 (23%)       | 0.018  |

|                                  |                     |                     |                     |                     |        |
|----------------------------------|---------------------|---------------------|---------------------|---------------------|--------|
| Unknown                          | 2                   | 0                   | 0                   | 2                   |        |
| Hypertension                     | 85 (24%)            | 70 (43%)            | 14 (52%)            | 1 (0.6%)            | <0.001 |
| Unknown                          | 2                   | 1                   | 0                   | 1                   |        |
| LVEF                             | 0.20 (0.15, 0.52)   | 0.15 (0.10, 0.20)   | 0.25 (0.16, 0.42)   | 0.55 (0.50, 0.65)   | <0.001 |
| Unknown                          | 78                  | 5                   | 1                   | 72                  |        |
| TIN                              | 70 (61, 73)         | 69 (57, 73)         | 71 (63, 74)         | 71 (65, 74)         | 0.019  |
| RIN                              | 8.50 (8.10, 8.90)   | 8.30 (7.80, 8.80)   | 8.70 (8.45, 8.85)   | 8.70 (8.20, 9.10)   | <0.001 |
| Unknown                          | 6                   | 1                   | 0                   | 5                   |        |
| DuplicationRate                  | 0.42 (0.38, 0.52)   | 0.42 (0.38, 0.52)   | 0.39 (0.35, 0.53)   | 0.43 (0.38, 0.51)   | 0.6    |
| <b>SV1</b>                       | 0.02 (-0.03, 0.04)  | 0.02 (-0.05, 0.04)  | 0.04 (-0.02, 0.04)  | 0.02 (-0.01, 0.04)  | 0.4    |
| <b>SV2</b>                       | -0.02 (-0.04, 0.02) | -0.01 (-0.03, 0.02) | -0.01 (-0.04, 0.02) | -0.02 (-0.04, 0.01) | 0.4    |
| <sup>1</sup> Median (IQR); n (%) |                     |                     |                     |                     |        |

<sup>2</sup> Kruskal-Wallis rank sum test; Pearson's Chi-squared test

**Bold highlight features were used in the statistical model.**

Acronyms: HW: Heart weight; TIN: Transcript Integrity Number; RIN: RNA integrity number; LVMass: Left ventricular mass; AFib: Atrial fibrillation events; VTVF: Ventricular tachycardia/ventricular fibrillation; LVEF: Left ventricular ejection fraction;

**Table S01:** Patient characteristics and sample metadata.

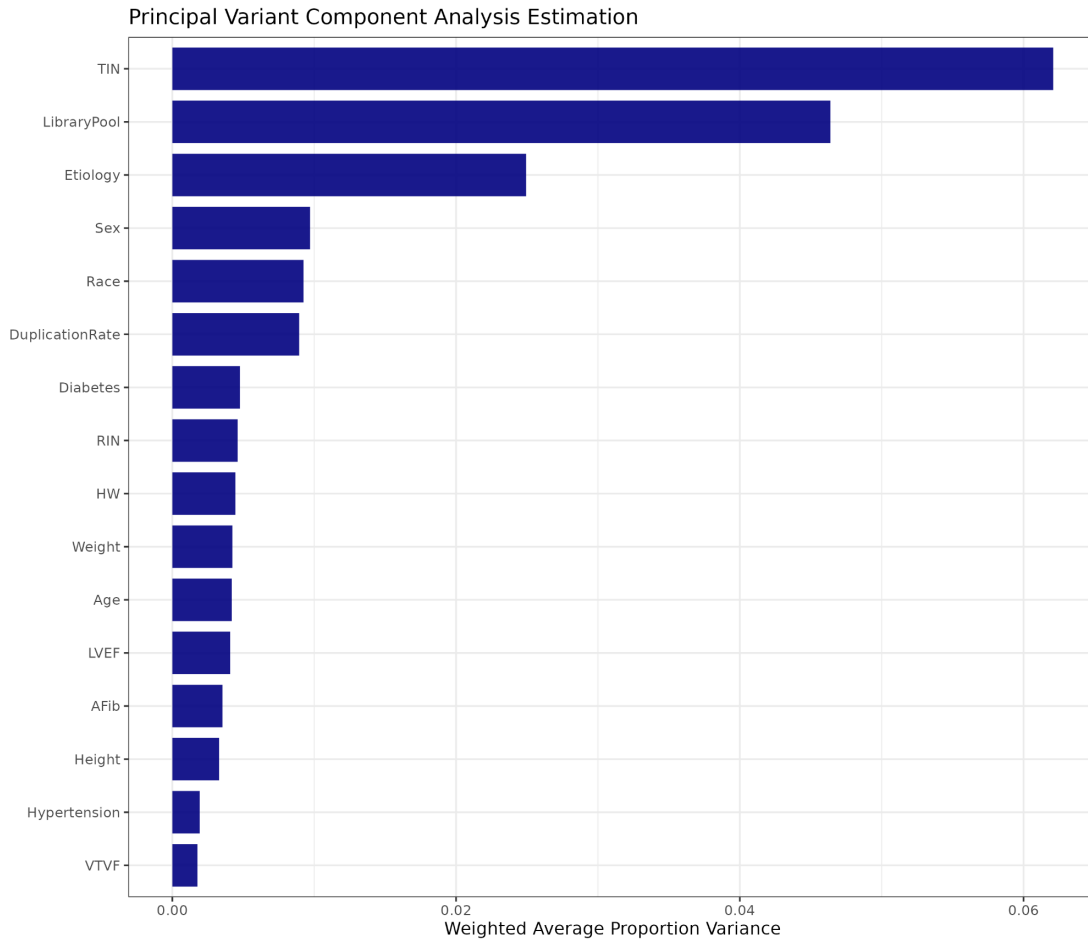

**Figure S01. Component analysis for covariates in the MAGnet RNA-Seq dataset.** The residuals (based on the full model fit) explain most of the proportion of variance (0.80) in the data. The contribution of the known model covariates to explaining data variance is shown in this figure. For example, Transcript Integrity Number (TIN) and LibraryPool (batch for library sequence) explain more variation in the data than sex.

| Software     | Version | Repository                                                                                      |
|--------------|---------|-------------------------------------------------------------------------------------------------|
| Flexbar      | 3.5.0   | <a href="https://github.com/seqan/flexbar">https://github.com/seqan/flexbar</a>                 |
| Bowtie2      | 2.3.5.1 | <a href="https://github.com/BenLangmead/bowtie2">https://github.com/BenLangmead/bowtie2</a>     |
| STAR         | 2.6.0c  | <a href="https://github.com/alexdobin/STAR/">https://github.com/alexdobin/STAR/</a>             |
| Picard tools | 2.22.1  | <a href="https://github.com/broadinstitute/picard">https://github.com/broadinstitute/picard</a> |
| StringTie2   | 2.1.3b  | <a href="https://github.com/gpertea/stringtie">https://github.com/gpertea/stringtie</a>         |

|               |        |                                                                                                                                                               |
|---------------|--------|---------------------------------------------------------------------------------------------------------------------------------------------------------------|
| sva           | 3.38.0 | <a href="https://github.com/jtleek/sva">https://github.com/jtleek/sva</a>                                                                                     |
| pvca          | 1.30.0 | <a href="https://github.com/dleelab/pvca">https://github.com/dleelab/pvca</a>                                                                                 |
| DESeq2        | 1.30.1 | <a href="https://github.com/mikelove/DESeq2">https://github.com/mikelove/DESeq2</a>                                                                           |
| GeneTonic     | 1.7.3  | <a href="https://github.com/federicomarini/GeneTonic">https://github.com/federicomarini/GeneTonic</a>                                                         |
| topGO         | 2.42.0 | <a href="https://bioconductor.org/packages/release/bioc/html/topGO.html">https://bioconductor.org/packages/release/bioc/html/topGO.html</a>                   |
| Shiny         | 1.7.1  | <a href="https://github.com/rstudio/shiny">https://github.com/rstudio/shiny</a>                                                                               |
| tidyverse     | 1.3.1  | <a href="https://github.com/tidyverse/tidyverse">https://github.com/tidyverse/tidyverse</a>                                                                   |
| dplyr         | 1.0.7  | <a href="https://github.com/tidyverse/dplyr">https://github.com/tidyverse/dplyr</a>                                                                           |
| ggplot2       | 3.3.5  | <a href="https://github.com/tidyverse/ggplot2">https://github.com/tidyverse/ggplot2</a>                                                                       |
| GenomicRanges | 1.46.0 | <a href="https://github.com/Bioconductor/GenomicRanges">https://github.com/Bioconductor/GenomicRanges</a>                                                     |
| rtracklayer   | 1.54.0 | <a href="https://github.com/lawremi/rtracklayer">https://github.com/lawremi/rtracklayer</a>                                                                   |
| DRIMSeq       | 1.18.0 | <a href="https://github.com/gosianow/DRIMSeq">https://github.com/gosianow/DRIMSeq</a>                                                                         |
| DoRothEA      | 1.7.0  | <a href="https://github.com/saezlab/dorothea">https://github.com/saezlab/dorothea</a>                                                                         |
| edgeR         | 3.32.1 | <a href="https://bioconductor.org/packages/release/bioc/html/edgeR.html">https://bioconductor.org/packages/release/bioc/html/edgeR.html</a>                   |
| BiRewire      | 3.26.5 | <a href="http://bioconductor.org/packages/release/bioc/html/BiRewire.html">http://bioconductor.org/packages/release/bioc/html/BiRewire.html</a>               |
| VIPER         | 1.28.0 | <a href="https://www.bioconductor.org/packages/release/bioc/html/viper.html">https://www.bioconductor.org/packages/release/bioc/html/viper.html</a>           |
| OmnipathR     | 3.3.20 | <a href="https://bioconductor.org/packages/release/bioc/html/OmnipathR.html">https://bioconductor.org/packages/release/bioc/html/OmnipathR.html</a>           |
| CARNIVAL      | 2.4.0  | <a href="https://github.com/saezlab/CARNIVAL">https://github.com/saezlab/CARNIVAL</a>                                                                         |
| globaltest    | 5.44.0 | <a href="https://www.bioconductor.org/packages/release/bioc/html/globaltest.html">https://www.bioconductor.org/packages/release/bioc/html/globaltest.html</a> |

**Table S02. Software used in this work.** The table lists the software, software version, and repository link used on the manuscript.

| carnival |      | gene2tx       |      |
|----------|------|---------------|------|
| contrast | text | gene_id       | text |
| igraph   | text | transcript_id | text |

  

| gff                      |                  |
|--------------------------|------------------|
| seqnames                 | text             |
| start                    | integer          |
| end                      | integer          |
| width                    | integer          |
| strand                   | text             |
| source                   | text             |
| type                     | text             |
| score                    | double precision |
| phase                    | integer          |
| gene_id                  | text             |
| gene_version             | text             |
| gene_name                | text             |
| gene_source              | text             |
| gene_biotype             | text             |
| transcript_id            | text             |
| transcript_version       | text             |
| transcript_name          | text             |
| transcript_source        | text             |
| transcript_biotype       | text             |
| tag                      | text             |
| transcript_support_level | text             |
| exon_number              | text             |
| exon_id                  | text             |
| exon_version             | text             |
| protein_id               | text             |
| protein_version          | text             |
| ccds_id                  | text             |

  

| metadata        |                  |
|-----------------|------------------|
| row_names       | text             |
| Run             | text             |
| Experiment      | text             |
| LibraryPool     | text             |
| TIN             | double precision |
| RIN             | double precision |
| DuplicationRate | double precision |
| TissueSource    | text             |
| Etiology        | text             |
| Race            | text             |
| Sex             | text             |
| Age             | double precision |
| Weight          | double precision |
| Height          | double precision |
| HW              | integer          |
| LVMass          | integer          |
| AFib            | text             |
| VTVF            | text             |
| Diabetes        | text             |
| Hypertension    | text             |
| LVEF            | double precision |
| SV1             | double precision |
| SV2             | double precision |

  

| rbp                 |                  |
|---------------------|------------------|
| gene_id_regulator   | text             |
| transcript_id       | text             |
| PValue              | double precision |
| Association         | integer          |
| Weights             | double precision |
| zscores             | double precision |
| gene_name           | text             |
| transcript_name     | text             |
| transcript_biotype  | text             |
| gene_name_regulator | text             |

  

| res            |                  |
|----------------|------------------|
| row_names      | text             |
| gene_id        | text             |
| log2FoldChange | double precision |
| padj           | double precision |
| SYMBOL         | text             |
| n              | integer          |
| dnu_pvadj      | double precision |
| dnu_dif        | double precision |
| module         | text             |
| rank           | double precision |
| contrast       | text             |

  

| res_DCMvsHCM   |                  |
|----------------|------------------|
| row_names      | text             |
| gene_id        | text             |
| log2FoldChange | double precision |
| padj           | double precision |
| SYMBOL         | text             |
| n              | integer          |
| dnu_pvadj      | double precision |
| dnu_dif        | double precision |
| module         | text             |
| rank           | double precision |

  

| res_DCMvsNFD   |                  |
|----------------|------------------|
| row_names      | text             |
| gene_id        | text             |
| log2FoldChange | double precision |
| padj           | double precision |
| SYMBOL         | text             |
| n              | integer          |
| dnu_pvadj      | double precision |
| dnu_dif        | double precision |
| module         | text             |
| rank           | double precision |

  

| res_HCMvsNFD   |                  |
|----------------|------------------|
| row_names      | text             |
| gene_id        | text             |
| log2FoldChange | double precision |
| padj           | double precision |
| SYMBOL         | text             |
| n              | integer          |
| dnu_pvadj      | double precision |
| dnu_dif        | double precision |
| module         | text             |
| rank           | double precision |

**Figure S02. Magnetique PostgreSQL schema.** The first column in each table represents the column name, and the second column represents the data type. The matrices of features for each patient are represented by three additional tables, named counts (gene counts), dtu fit proportions (fitted transcript proportions), and vst (variance stabilizing transformed gene counts), which were not included in the scheme.

**MAGNETIQUE**

**Overview of Magnetique**

Magnetique is a user-friendly application to interactively explore data from the Myocardial Applied Genomics Network MAGNET consortium.

Magnetique can be used to identify novel molecular mechanisms associated with cardiomyopathies with potential diagnostics, prognosis and therapeutics values.

Magnetique offers:

- Gene View.** Explore gene expression, differentially expressed genes, and genes with differential transcript usage for three different contrasts.
- Gene Set View.** Explore enriched gene sets across three different contrasts for three ontologies.
- Carnival View.** Explore regulatory networks leading to transcription factor activity for three different contrasts.
- RBP:RNA View.** Explore interactions between RNA-binding proteins (RBPs) and RNA species that undergo different transcript usages.
- Bookmarks.** Save and download genes of interests.

**Study Overview.** Sample information, phenotype, technical covariates, and summary statistics are shown on the right.

**Method**

We curated and processed data from the Myocardial Applied Genomics Network MAGNET consortium, consisting of whole-transcriptomes of left ventricle (LV) tissues from end-stage heart failure (HF) patients and due to dilated cardiomyopathy (DCM, n=165) or hypertrophic cardiomyopathy (HCM, n=27) and from unmatched non-failing hearts from organ donors (NFD, n=162). Analyses include (i) differential gene expression, (ii) differential transcript usage, (iii) gene set enrichment, and (iv) gene regulatory network inference. Please refer to [citation] for a detailed description and further examples.

The app is developed and maintained by the Dieterich Lab and the Bioinformatics Group at the IMBEI (University Medical Center Mainz). Source code is available on GitHub. To address questions, bugs or feedback, please use the GitHub bug tracker.

[More about the development team](#)

**Patient characteristics and technical covariates**

| Characteristic | Overall, N = 354 <sup>2</sup> | DCM, N = 165 <sup>2</sup> | HCM, N = 27 <sup>2</sup> | NFD, N = 162 <sup>2</sup> | p-value <sup>2</sup> |
|----------------|-------------------------------|---------------------------|--------------------------|---------------------------|----------------------|
| Race           |                               |                           |                          |                           | <0.001< /td>         |
| AA             | 121 (34%)                     | 76 (46%)                  | 1 (3.7%)                 | 44 (27%)                  |                      |
| C              | 233 (66%)                     | 89 (54%)                  | 26 (96%)                 | 118 (73%)                 |                      |
| Age            | 56 (48, 62)                   | 54 (47, 59)               | 51 (43, 57)              | 57 (51, 65)               | <0.001< /td>         |
| Sex            |                               |                           |                          |                           | 0.021                |
| F              | 164 (46%)                     | 65 (39%)                  | 11 (41%)                 | 88 (54%)                  |                      |
| M              | 190 (54%)                     | 100 (61%)                 | 16 (59%)                 | 74 (46%)                  |                      |
| Weight         | 79 (66, 91)                   | 76 (67, 90)               | 72 (60, 83)              | 82 (68, 99)               | 0.004                |
| Height         | 170 (163, 178)                | 170 (163, 180)            | 170 (160, 180)           | 168 (163, 175)            | 0.046                |
| Unknown        | 1                             | 0                         | 0                        | 1                         |                      |
| LVMass         | 247 (199, 322)                | 320 (262, 401)            | 318 (276, 340)           | 214 (179, 278)            | <0.001< /td>         |
| Unknown        | 202                           | 119                       | 15                       | 68                        |                      |
| AFib           | 104 (30%)                     | 67 (41%)                  | 20 (74%)                 | 17 (11%)                  | <0.001< /td>         |
| Unknown        | 4                             | 3                         | 0                        | 1                         |                      |
| VTVF           | 85 (24%)                      | 70 (43%)                  | 14 (52%)                 | 1 (0.6%)                  | <0.001< /td>         |
| Unknown        | 2                             | 1                         | 0                        | 1                         |                      |
| Diabetes       | 76 (22%)                      | 39 (24%)                  | 0 (0%)                   | 37 (23%)                  | 0.018                |
| Unknown        | 2                             | 0                         | 0                        | 2                         |                      |
| Hypertension   | 85 (24%)                      | 70 (43%)                  | 14 (52%)                 | 1 (0.6%)                  | <0.001< /td>         |
| Unknown        | 2                             | 1                         | 0                        | 1                         |                      |

**Figure S03. Partial screenshot of the landing page for the Magnetique application.** The image shows the landing page for the Magnetique application. The different views can be accessed by the multiple tabs at the top. The Welcome tab is followed by the Gene, Gene set, and Carnival views. The help pages are specific to each tab and can be accessed by the interrogation mark at the upper right section on the page (not shown).

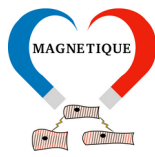

Options:

Contrast id  
DCMvsHCM

Bookmark

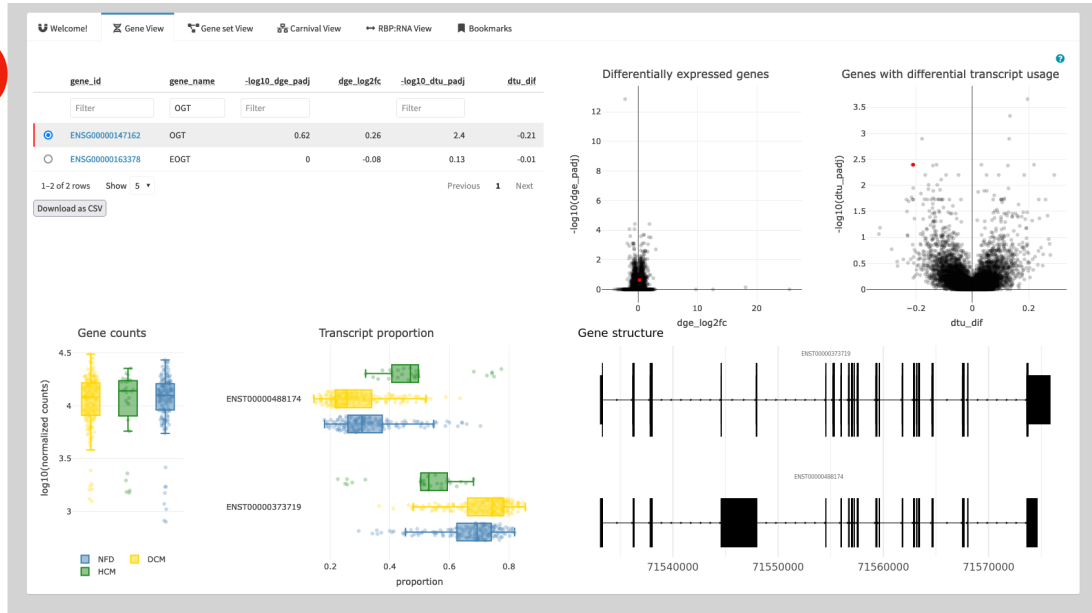

**Figure S04: Gene view page.** This view presents the summaries for the DGE and DTU analyses. In the top left, the table shows the DGE statistics and summary with the minimum adjusted  $p$ -value and matching DIF for the DTU analysis. In the top center and right, the volcano plots for DGE and DTU, respectively. At the bottom, the summaries for counts and transcript usage and the transcript structure for transcripts that were tested for DTU are triggered once a row in the table is selected. The option in the sidebar (left) allows users to select the contrast.

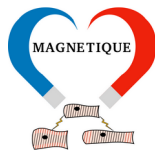

Options:

Contrast id  
DCMvsHCM

Gene Ontology (GO)  
BP

Number of genesets  
15

Color by  
z\_score

Bookmark

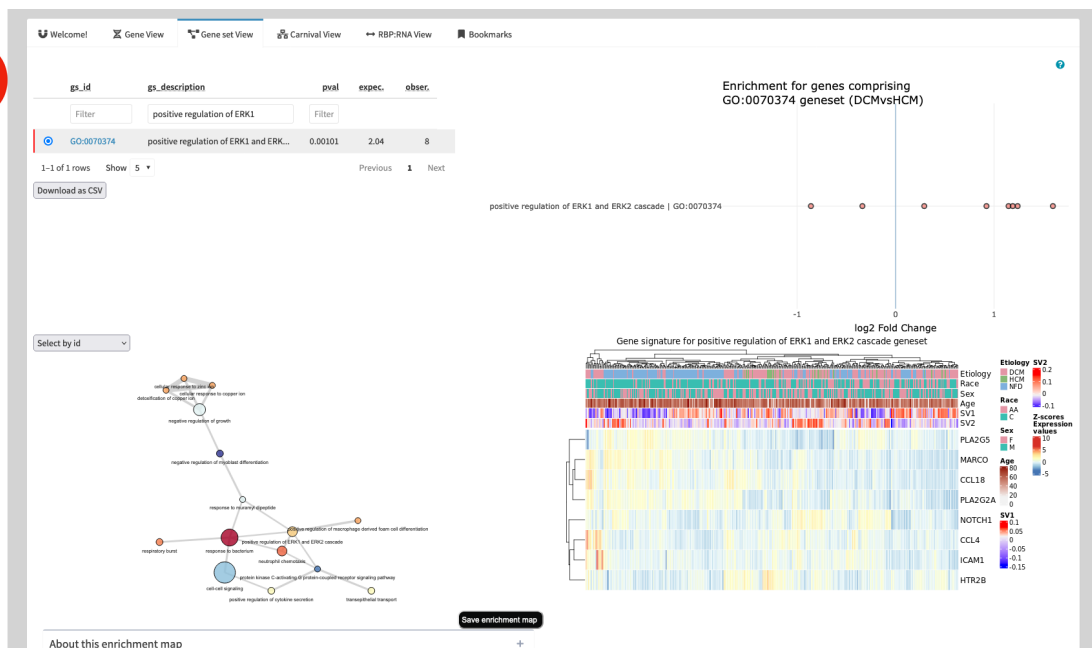

**Figure S05: Gene set view.** The top-left table lists the terms and statistics for the gene set enrichment analysis with TopGo. The top right plot shows the individual log2 fold changes for genes for multiple terms or a single one if a row in the table is selected. The network on the left



shows the context among different terms; see Figure S09 for details. The heatmap in the bottom right shows gene signature (z-score transformed gene expression) and covariates used for modeling for a given term, once selected from the table. Multiple options can be set on the side panel.

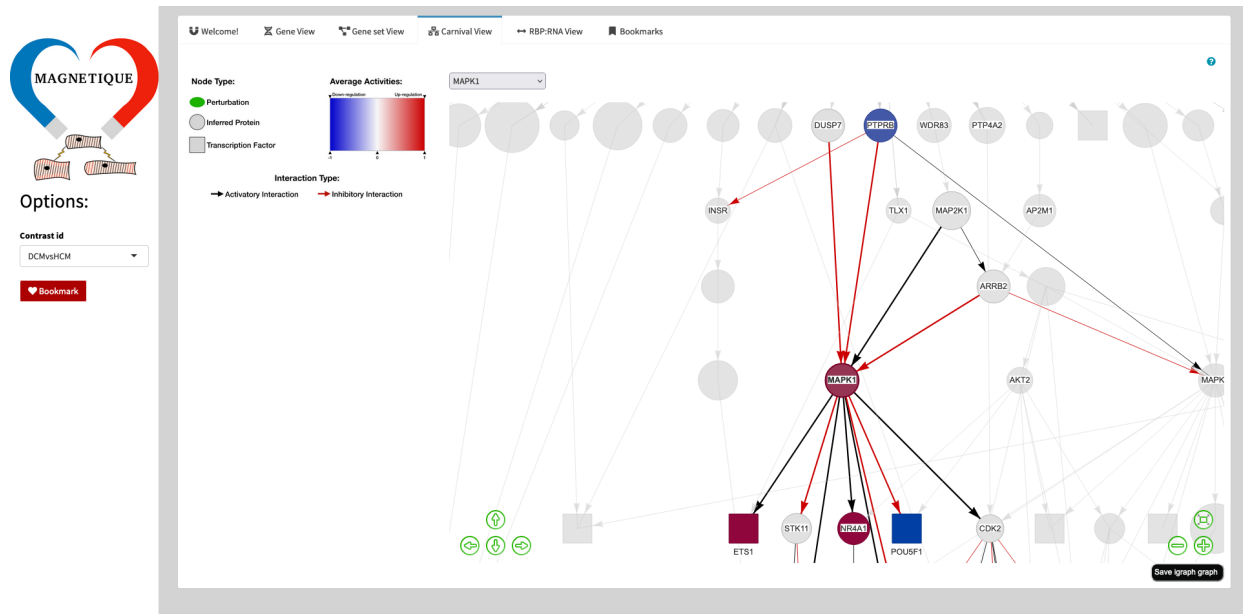

**Figure S06: Carnival View.** The network shows multiple levels of protein signaling networks and inferred protein activities given the gene expression signature of a contrast (selected in the options). Regulatory interactions represented by the edges (edges) can either activate or inhibit targets. Transcription factors are represented by rectangular nodes.

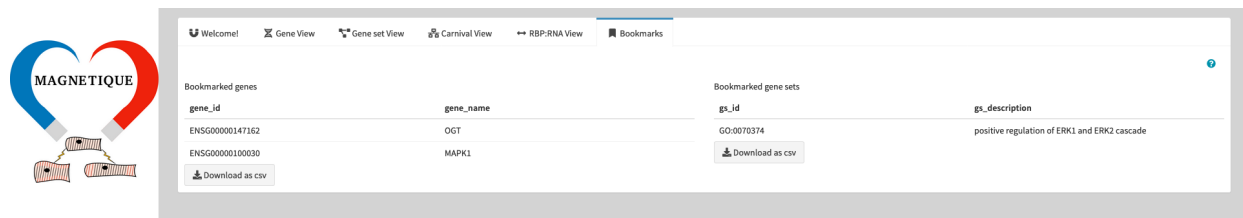

**Figure S07: Bookmarks tab.** The bookmarks tab shows the bookmarked genes from the Gene View or Carnival View and gene sets from the Gene set View that were selected with the bookmark button. The lists can be downloaded with the "download as csv" button.

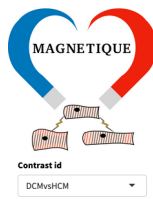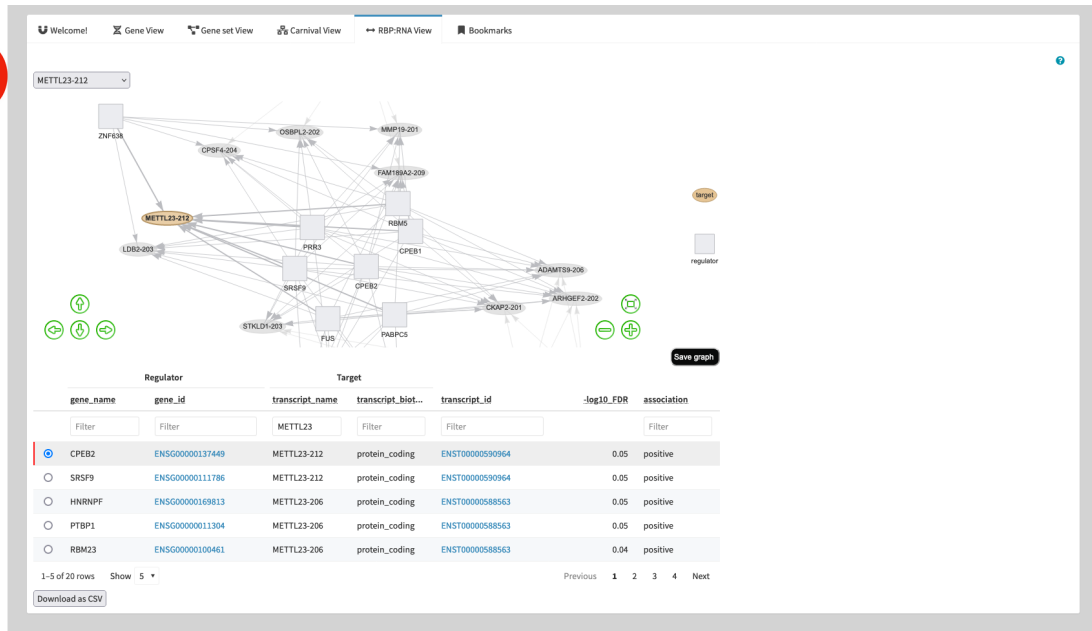

**Figure S08 Overview of RBP:RNA View.** This view lists the interactions between RBP (regulator) and transcripts isoforms (targets) for genes that host significant DTU events.

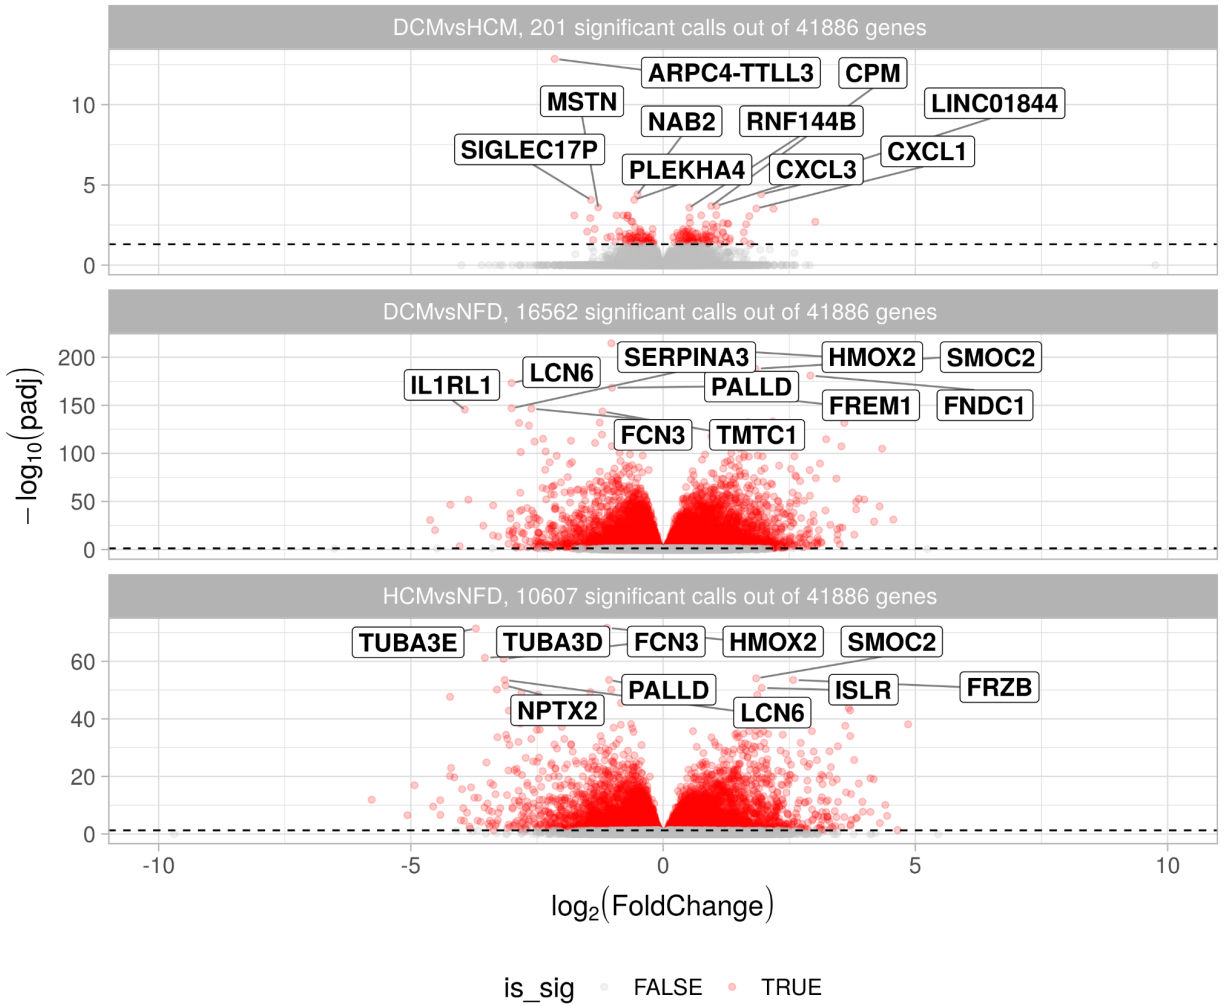

**Figure S09: Volcano plot for the DGE analysis.** Red circles represent genes called significant (adjusted p-value  $\leq 0.05$ ). Top ten genes for each contrast were named with the gene symbol.

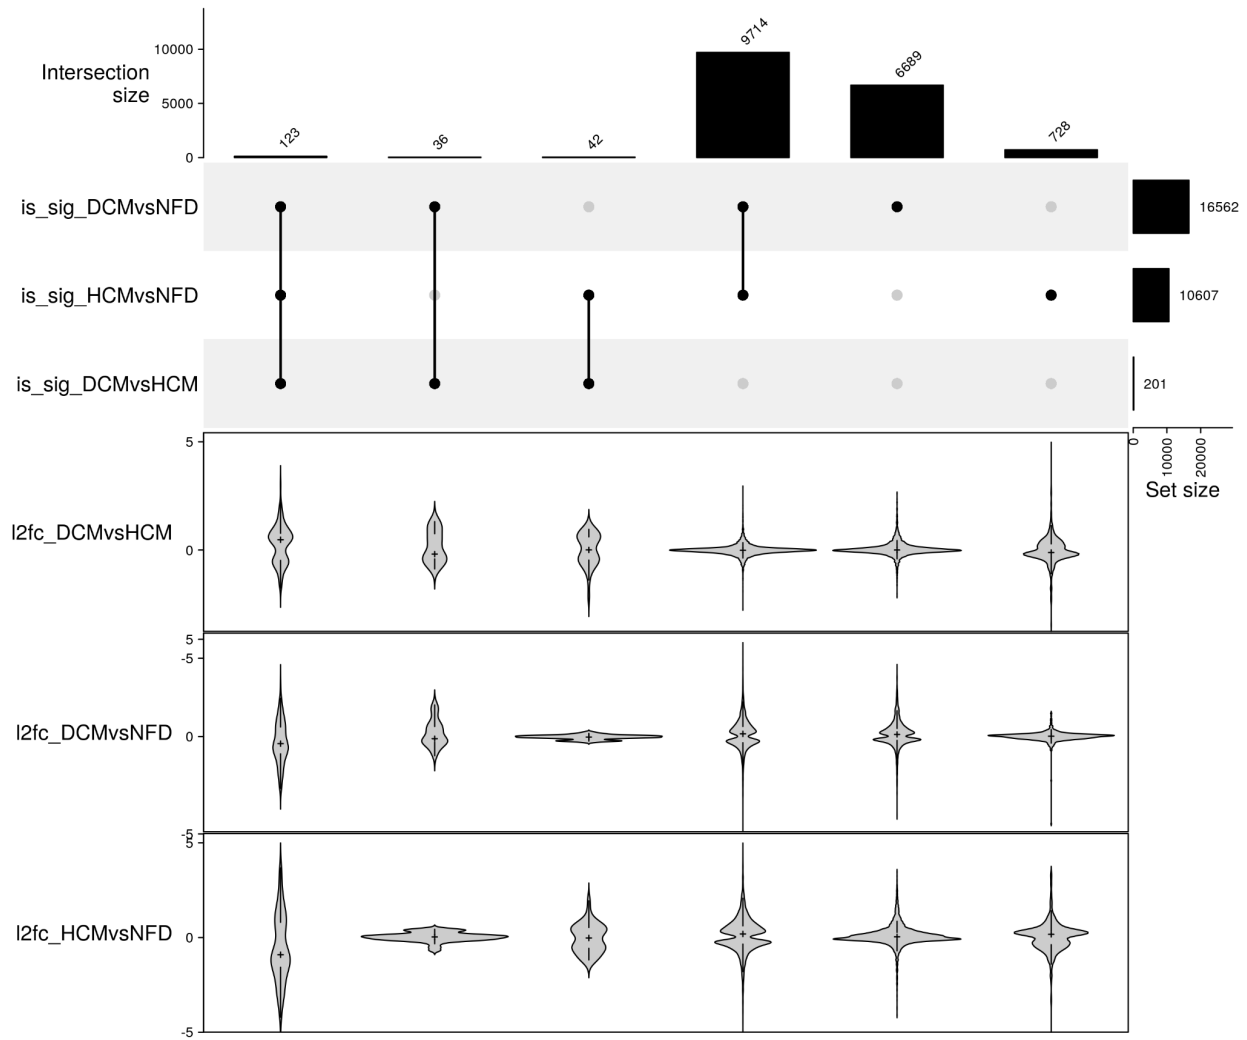

**Figure S10: Intersections of differentially expressed genes among contrasts.** The UpSet plot comprises three panels: bar plots with the intersection sizes (top), the intersections of genes that were called significant among the three comparisons (middle), and the distributions of the log fold change for each intersection (bottom). Each column represents an intersection among the common genes for each contrast. The bar plot in the middle left shows the total number of genes called significant for each comparison. A total of 123 genes are commonly differentially expressed by the three contrasts. Genes in this combination have a median  $\log_2(\text{FoldChange})$  of 0.48, and so are upregulated.



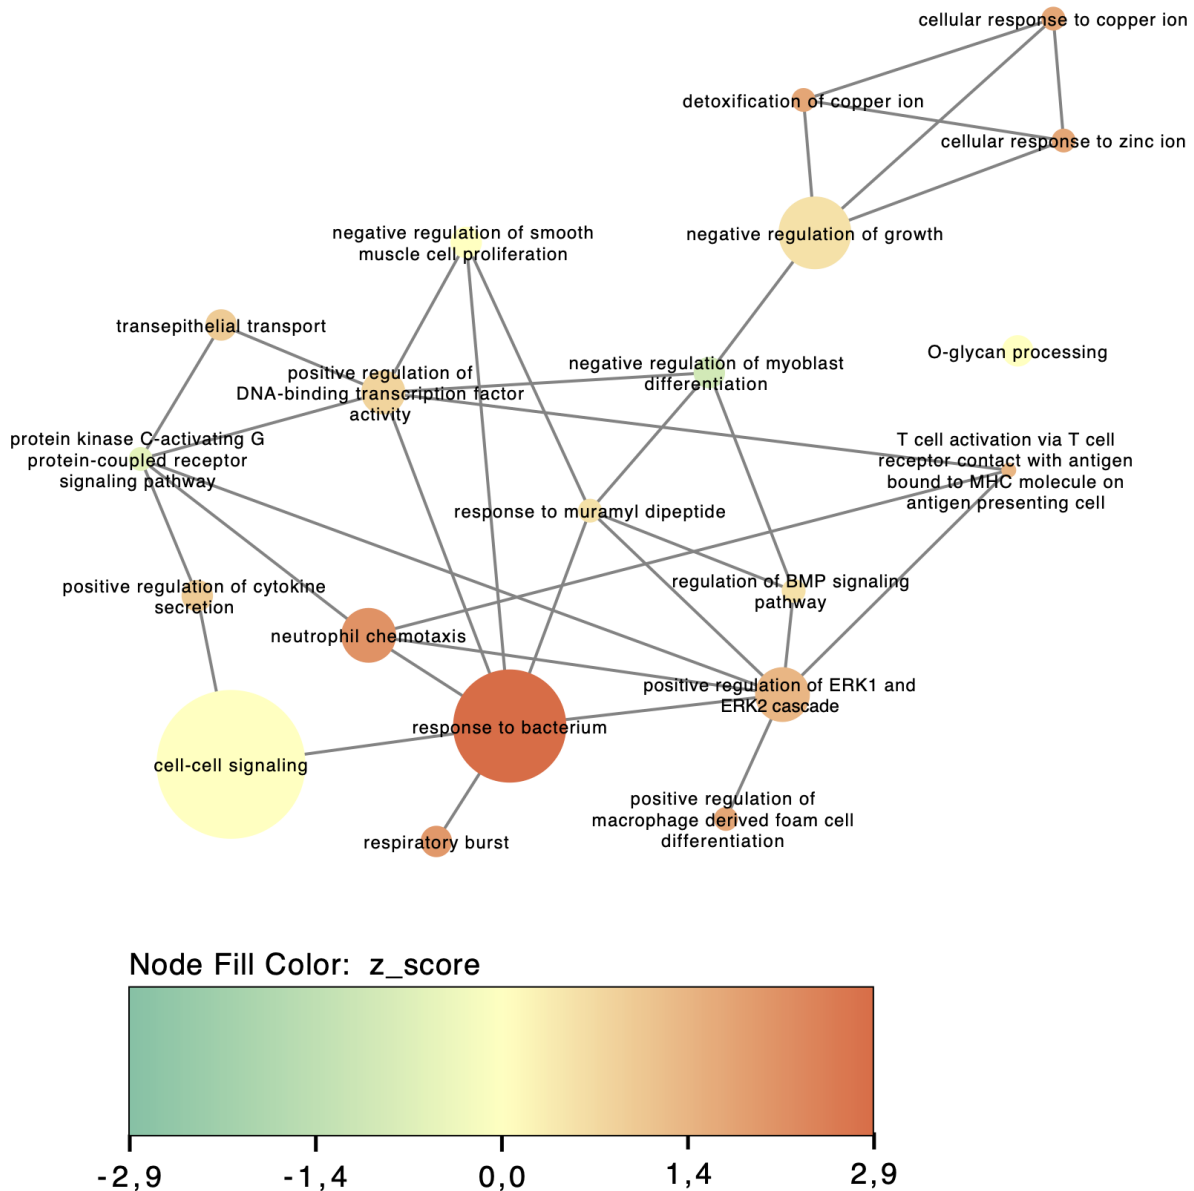

**Figure S12: The enrichment map for top biological process terms called significant in the GSEA.** Node sizes represent the number of genes per term, and node color represents the average log fold change (z-score transformed) for gene members of each gene set; orange nodes have more genes highly expressed in DCM, while green nodes have more genes highly expressed in HCM. The cell-cell signaling pathway was the term with the highest number of DGE genes. Negative regulation of myoblast differentiation (GO:0045662, more genes highly expressed in HCM) and response to bacterium (GO:0009617, more genes highly expressed in DCM) are terms with more extreme effect sizes.

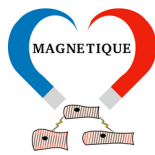

Options:

Contrast id  
DCMvsHCM

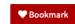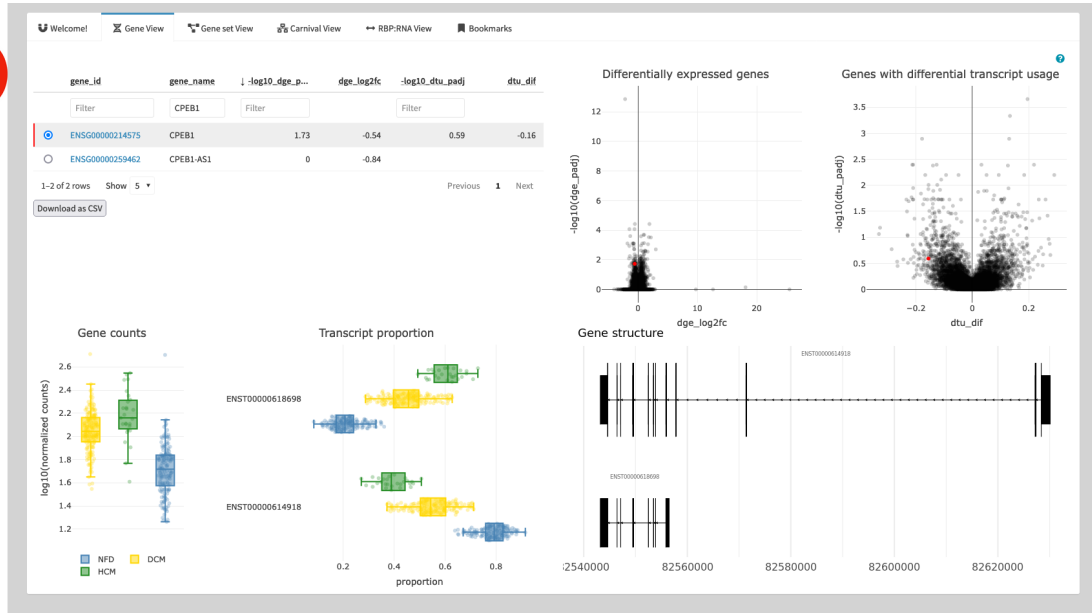

**Figure S13 Overview of DGE and DTU for CPEB1.** CPEB1, the Cytoplasmic Polyadenylation Element Binding Protein 1. It is differentially expressed for DCMvsHCM comparison, but also undergoes different transcript usage for DCMvsNFD and HCMvsNFD. The two disease condition show the same pattern for isoform usage: the primary use of CPEB1-211 ([ENST00000615198](#)) while the longer isoform (CPEB1-209 - [ENST00000614918](#)) is preferably used in the NFD.

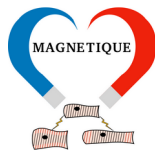

Options:

Contrast id  
DCMvsHCM

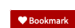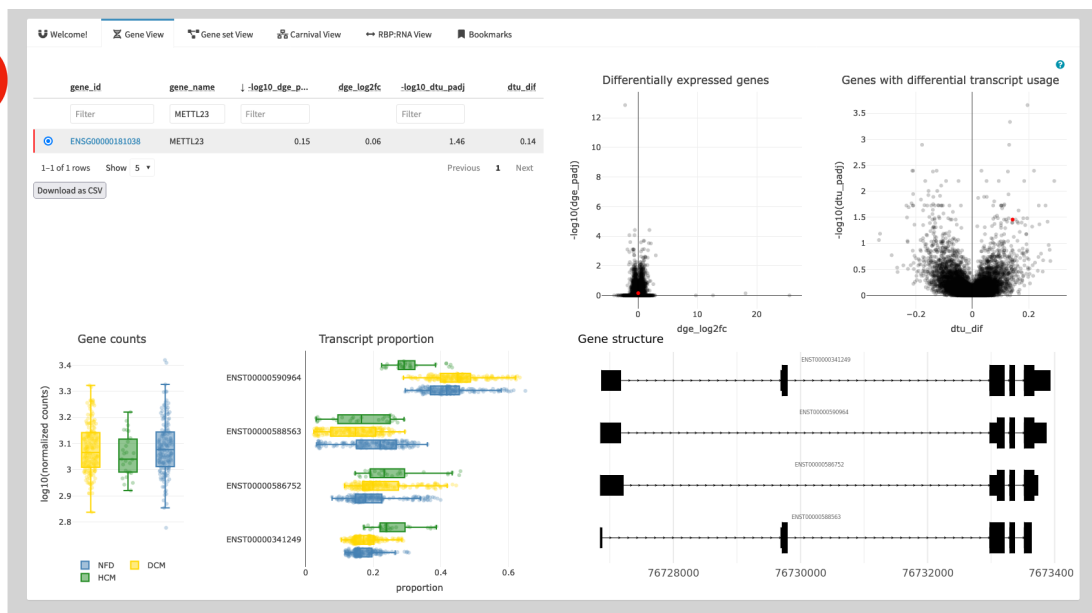

**Figure S14 Overview of DGE and DTU for METTL23.** Histone-arginine methyltransferase METTL23 is one of the targets that was prioritized by reverse global test analysis and also undergoes DTU.

| Gene_id regulator | Gene_name regulator | Transcript_name Target | Transcript_id Target | Transcript_biotype Target | FDR                  | Association |
|-------------------|---------------------|------------------------|----------------------|---------------------------|----------------------|-------------|
| ENSG00000214575   | CPEB1               | FAM189A2-209           | ENST00000645516      | retained_intron           | $4.7 \times 10^{-2}$ | +           |
| ENSG00000214575   | CPEB1               | METTL23-212            | ENST00000590964      | protein_coding            | $4.7 \times 10^{-2}$ | -           |
| ENSG00000214575   | CPEB1               | CKAP2-201              | ENST00000258607      | protein_coding            | $4.7 \times 10^{-2}$ | -           |
| ENSG00000214575   | CPEB1               | CPSF4-204              | ENST00000436336      | protein_coding            | $4.7 \times 10^{-2}$ | -           |
| ENSG00000214575   | CPEB1               | ARHGEF2-202            | ENST00000313695      | protein_coding            | $4.9 \times 10^{-2}$ | +           |
| ENSG00000214575   | CPEB1               | ADAMTS9-206            | ENST00000477180      | retained_intron           | $4.9 \times 10^{-2}$ | -           |

**Table S04: Targets of CPEB1 with FDR  $\leq 0.05$  for the reverse global test and adjusted  $p$ -value  $< 0.05$  for DTU.**

|                      | DCMvsHCM | DCMvsNFD | HCMvsNFD |
|----------------------|----------|----------|----------|
| Nodes (proteins)     | 111      | 142      | 92       |
| Edges (interactions) | 201      | 265      | 164      |

**Table S05: Number of components for the network solutions obtained by CARNIVAL.**
